# Supplementary material for: The Interest of a Systematic Toxicological Analysis Combined with Forensic Advice to Improve the Judicial Investigation and Final Judgment in Drug Facilitated Sexual Assault Cases
Source: MDPI journal article supplement (doi:10.3390/ph14050432), 2021-05-04
Supplement: s1 [file s1]

**Table S1 (Supplementary Data): Mass-spectrometric parameters for the detection of neuroleptics in blood and urine**

| Compound              | Precursor ion (m/z) | Product ions (m/z) | Cone Voltage (CV) | Collision Energy (eV) |
|-----------------------|---------------------|--------------------|-------------------|-----------------------|
| Sulpride              | 342,2               | 112,1              | 40                | 30                    |
|                       |                     | 214,1              | 40                | 40                    |
| Tiapride              | 329,1               | 132,9              | 30                | 50                    |
|                       |                     | 177,0              | 30                | 50                    |
| Olanzapine            | 313,2               | 213,0              | 30                | 40                    |
|                       |                     | 256,1              | 30                | 30                    |
| Desmethyloanzapine    | 299,2               | 213,0              | 40                | 40                    |
|                       |                     | 256,1              | 40                | 30                    |
| 7-OH-quetiapine       | 400,2               | 269,1              | 40                | 35                    |
|                       |                     | 295,1              | 40                | 35                    |
| Pimpamperon           | 376,1               | 164,9              | 35                | 35                    |
|                       |                     | 291,0              | 35                | 24                    |
| Amisulpride           | 370,2               | 214,0              | 30                | 50                    |
|                       |                     | 149,0              | 30                | 50                    |
| Risperidone           | 411,3               | 110,1              | 35                | 60                    |
|                       |                     | 191,2              | 35                | 40                    |
| 9-OH-Risperidone      | 427,2               | 110,0              | 40                | 60                    |
|                       |                     | 207,1              | 40                | 40                    |
| Desmethylozapine      | 313,2               | 227,0              | 30                | 40                    |
|                       |                     | 270,1              | 30                | 30                    |
| Bemiperidol           | 382,2               | 122,8              | 36                | 52                    |
|                       |                     | 164,9              | 36                | 34                    |
| Clozapine             | 327,1               | 84,0               | 50                | 30                    |
|                       |                     | 192,0              | 50                | 40                    |
| Quetiapine            | 384,2               | 221,0              | 38                | 52                    |
|                       |                     | 253,0              | 38                | 30                    |
| Droperidol            | 380,1               | 164,9              | 24                | 34                    |
|                       |                     | 193,9              | 24                | 24                    |
| Prothipendyl          | 286,1               | 213,0              | 26                | 38                    |
|                       |                     | 241,0              | 26                | 24                    |
| Haloperidol           | 376,1               | 122,9              | 34                | 54                    |
|                       |                     | 164,9              | 34                | 36                    |
| Bromperidol           | 420,1               | 123,0              | 35                | 60                    |
|                       |                     | 165,1              | 35                | 30                    |
| Aripiprazol           | 448,2               | 98,1               | 30                | 50                    |
|                       |                     | 285,1              | 30                | 40                    |
| Clotiapine            | 344,1               | 255,1              | 34                | 44                    |
|                       |                     | 287,1              | 34                | 28                    |
| Levomepromazine       | 329,0               | 209,9              | 24                | 44                    |
|                       |                     | 241,9              | 24                | 30                    |
| Pimozide              | 462,3               | 109,1              | 38                | 58                    |
|                       |                     | 328,2              | 38                | 40                    |
| Sertindole            | 441,2               | 71,0               | 40                | 60                    |
|                       |                     | 113,0              | 40                | 40                    |
| Flupentixol           | 435,1               | 264,9              | 42                | 52                    |
|                       |                     | 304,9              | 42                | 42                    |
| Desmethyloanzapine-d8 | 307,2               | 198,1              | 40                | 50                    |
| Risperidone-d4        | 415,3               | 195,1              | 40                | 40                    |
| 9-OH-Risperidone-d4   | 431,3               | 211,2              | 40                | 40                    |
| Clozapine-d4          | 333,2               | 274,1              | 30                | 40                    |
| Quetiapine-d8         | 392,2               | 258,1              | 30                | 40                    |
| Haloperidol-d4        | 380,2               | 169,2              | 35                | 40                    |
| Aripiprazol-d8        | 456,2               | 293,1              | 35                | 45                    |
